# Supplementary material for: Relaxed Evolution in the Tyrosine Aminotransferase Gene Tat in Old World Fruit Bats (Chiroptera: Pteropodidae)
Source: PubMed Central journal article supplement (PMC4019583; doi:10.1371/journal.pone.0097483), 2014-05-13
Supplement: pone.0097483.s003.pdf [file pone.0097483.s003.pdf]

|                                  |             |            |            |             |            |             |             |             |            |            |
|----------------------------------|-------------|------------|------------|-------------|------------|-------------|-------------|-------------|------------|------------|
|                                  |             |            |            |             | 11111      | 1111111111  | 1111111111  | 1111111111  | 1111112222 | 222222222  |
|                                  | 1122222233  | 3333333344 | 4445555666 | 6677777888  | 9999900111 | 1222222223  | 3334444555  | 6777777888  | 8899990000 | 0111222333 |
|                                  | 0312578901  | 2345678902 | 4790138123 | 5602358348  | 1345716025 | 7123567890  | 6892589137  | 4013569123  | 4535690123 | 5034678258 |
| human                            | SNHVGRSSVP  | GKMKGRKARS | RDAKKFADNM | VKNTMSIVFP  | PVTQMLYASF | SEIAYYHCPE  | KVISSIDCAN  | VSLKLMAMIEV | KLSEIKQLEY | IATVSKRCAA |
| mouse                            | VSRVGRSSVQ  | GRAKGRKARN | RDSNKFADNM | VKNTVSIVFP  | PVTQMLYASY | SEVAYYHCPE  | KVISSIECAN  | ISLRLAMIEV  | KLSEIKQLES | IAVVSKRKA  |
| rat                              | VSHVGRNSVQ  | GRKKGRKARD | RDSNKFADNM | VQNTVSIVFP  | PVTQMLYASY | SEVAYYHCPE  | KVISSIECAN  | ISLRLAMIEV  | KLSEIKQLES | IAVVSKRKA  |
| cow                              | DSHVARRSVL  | GKVKSRKARS | RDSNKFADNM | VKNTMAIVFP  | PVTQMLFVSY | SEVAYYHCPE  | KVISSIECAN  | VSLRLAMIEV  | KLNEIKQLES | IVIVSRRKAA |
| dog                              | SNHVGRSSLP  | GKMKGRKARS | RDSNKFADSS | VKNATAIVFP  | PVTQMLYASY | SEIAYYHRPE  | KVISSIECAN  | VSLRLAMIEV  | KLSEIKQLES | IATVSKSKAA |
| pig                              | GNHVARIPVP  | GKMKGRKARS | RDSNKCADSM | VKNTTSIVFP  | QVTQMLYASY | SEVAYYHCPE  | KVISSIECAN  | VPLRLAMIEV  | KLSEIKHLES | IAVVSRNKAT |
| panda                            | SNHVGRSSLP  | GKMKGRKARS | KDSNKFADSM | VKNTMAIVFP  | PVTQMLYASY | SEIAYYHRPE  | KVISSIECAN  | VSLRLAMIEV  | KLSEIKQLES | IATVSKSKAA |
| horse                            | GNHVSRSAP   | GKMKGRKARS | RDSNKFADNM | VKNTMAIVFS  | PVTQLVYATY | SEIAYYHHPPE | KVISSIECAN  | VALRLAMIEV  | KCSEIKQVES | VAIVSKSKAA |
| <i>Cynopterus sphinx</i>         | SDHMNRSSAP  | EKVKGRKPRS | KDANRYADSM | MEDTTTILSP  | PIIQLLYASY | SEVAYFRCPPE | KVISSIECAN  | ASPRHAMIEV  | KLSEIKQLES | IATVSKSDAA |
| <i>Rousettus leschenaultii</i>   | SDHVNRSVQ   | EKVKGRQPGS | RDANRYADNM | LEDPMSELLFP | PIIQLLYASY | SEIAYYHHPK  | KVICSIIECAN | ASPRHAMIEV  | KLSEIKQLES | IATVSKSDAA |
| <i>Eonycteris spelaea</i>        | SDHVSRSVQ   | EKVKGRKTES | RDANRYADSM | MEDTTAILFP  | PIIQLLYASY | SEVAYYHHPK  | KVICSIIECAN | ASPRHAMIEV  | KLSEIKQLES | IATVSKSDAA |
| <i>Pteropus vampyrus</i>         | SDHINRSSVS  | EKVKGRKPRS | RDANRYADSM | MEDTTPILCP  | PIIKLLYASY | SEIAYYHRPE  | KVISSIECAN  | ASPRHAMIEV  | KLSEIKQLES | IATVSKSDAA |
| <i>Rhinolophus ferrumequinum</i> | GNHVGKNSKQ  | EKGKGRKARS | RDANNFTDNM | VKHTMAIVFP  | PVTQMLYASY | SEIAYYHCPE  | NVISGIECAN  | LSLRLAMIEV  | KLSEIKQLKS | IATVSKNKAA |
| <i>Rhinolophus pusillus</i>      | GNHVGKNSKQ  | EKVKGRKARS | KDSNKFADNM | VKDAMAIVFP  | PVTQMLYASY | SEIAYYHCPE  | KVISSIECAN  | ISLRLAMIEV  | KLSEIKQLES | IATVSTNKAA |
| <i>Hipposideros armiger</i>      | SNHVGKNSKQ  | GKVKGRKARS | KESNKFADNM | VKNTMSIVFP  | PVTQMLYASY | SEVAYYHCPE  | KVISSIECAN  | VSLRLAMIEV  | KLSEIKQLES | IATVSKSKAA |
| <i>Hipposideros pratti</i>       | SNHVGKNSKQ  | GKVKGRKARS | KESNKFADNM | VKNTMSIVFP  | PVTQMLYASY | SEVAYYHCPE  | KVISSIECAN  | VSLRLAMIEV  | KLSEIKQLES | IATVSKSKAA |
| <i>Megaderma lyra</i>            | GTHVGRSSMP  | GKVKGRKARS | KDSNKFADSM | VKDAMAIVFP  | PVTQMLYASY | SEIAYYHCPE  | KVISSIECAN  | VSLKLMAMIEV | KLSEIKQLES | IATVSKSKAA |
| <i>Megaderma spasma</i>          | GTHVDRSSMP  | GKARGRKARS | KDSNKFADSM | VKDAMAIVFP  | PVTQMLYASY | SEIAYYHCPE  | KVISSIECAN  | VSLKLMAMIEV | KLSEIKQLES | IATVSKSKAA |
| <i>Myotis ricketti</i>           | DDHVGRSSTP  | GKAKGRKARS | KDSNKFADSM | VKDMSIVFP   | PVTQMLYASY | SEVAYYHCPE  | KVISSIECAN  | VSLRLAMIEV  | KLSEIKQLES | IATVSRKAA  |
| <i>Pipistrellus abramus</i>      | GDHVGRSSTL  | GKAKGRKARS | KDANNFADSM | VKDMSIVFP   | PVTQMLYASF | SEVAYYHCPE  | KVISSIECAN  | VSLRLAMIEV  | KLSEIKQLES | IATVSRKAA  |
| <i>Scotophilus kuhlii</i>        | GDHVGRSSTP  | GKGRGRKARS | KDSNKFADSM | VKDMSIVFP   | PVTQMLYASY | SEVAYYHCPE  | KVISSIECAN  | VSLRLAMIEV  | KLSEIKQLES | IATVSRKAA  |
| <i>Miniopterus fuliginosus</i>   | GNHVGGRSSMP | GKAKGRKARS | KDSNKFADSM | VKDMSIVFP   | PVTQMLYASY | SEIAYYHCPE  | KVISSIECAN  | VSLRLAMIEV  | KLSEIKQLES | IATVSRKAA  |
| <i>Tadarida plicata</i>          | GPPVGRSSMP  | GKAKGRKARS | KESNKFADSM | VKDMSIVFP   | PVIQMLYASY | SEIAYYHCPE  | KVISSIECAN  | VSLRLAMIEV  | KLSEIKQLES | IATVSRKAA  |
| <i>Mormoops megalophylla</i>     | GSHVGKNSLP  | GKVKGRKARS | KDSNKFADSM | VKDMSIVFP   | PVTQMLYASY | SEIAYYHCPE  | KVISSIECAN  | VSLRLALVEV  | RFSEIKQLES | IATVSRKAA  |
| <i>Pteronotus parnellii</i>      | GNHVGGRNSTL | GKVKGRKARS | KDSNKFADSM | VKDMSIVFP   | PVTQMLYASY | SEIAYYHCPE  | KVISSIECAN  | VSLRLAMIEV  | KLSEIKQLES | IATVSRSEAA |
| <i>Desmodus rotundus</i>         | GSHVGKNSQP  | GKVKGRKARS | KDANNFDDGM | VKAAMSIVFP  | PVIQMLYASY | SEIAYYHCPE  | KVISSIECAN  | VSLRLAMIEV  | KLSEIKQLES | IATVSRKAA  |
| <i>Leptonycteris yerbabuena</i>  | RSHVGKNSLP  | GKVKGRKARS | KDANNFADNM | VKDMSIVFP   | PVTQMLYASY | CDIAYYHCPE  | KVISSIECAN  | VSLRLAMIEV  | KLSEIKQLES | IATVSRKAA  |
| <i>Artibeus lituratus</i>        | RSHVGKNSLP  | GKVKGRKARS | KAANNFADSM | VKDMSIVFP   | PVTQMLYASY | SEIAYYHCPE  | KVISSIECAN  | VSLRLAMIEV  | KLSEIKQLES | IATVSRKAA  |
|                                  | 2222222222  | 2222222222 | 2333333333 | 3333333333  | 3333333333 | 3333333333  | 3444444444  | 4444444444  | 44         |            |
|                                  | 3444555566  | 6666778999 | 9001111223 | 3333444444  | 5556666667 | 7778889999  | 9000001112  | 2222334444  | 44         |            |
|                                  | 9015147801  | 3589499348 | 9670137292 | 5679015789  | 0580467891 | 4792780157  | 8134781361  | 2467260346  | 89         |            |
| human                            | RQCLGVDCEY  | LTTDSALLIR | DRDVKSLISC | PQEYHNFKN   | AGAIRVRPSA | LGEHENVERV  | ASHCATEPIT  | VEMMSEQHCE  | SQ         |            |
| mouse                            | RQCLGVDCEY  | MTNSALLIR  | DRDVKSLISQ | PQEYHDFKN   | AGSIQVRPSA | LGEHENVERI  | ASHCATEPFT  | VEMMSEQHCE  | SQ         |            |
| rat                              | RQCLGVDCEY  | LNTNSALLIR | DRDVKSLISQ | PQEYHDFKN   | AGAIQVRPSA | LGEHENVERI  | AAHCATEPFT  | VEMMSEQHCE  | SQ         |            |
| cow                              | RQCLGVDSFE  | LTSKSAMLIR | DRDVKSLISC | PRVYHNFKN   | AGAIRIRPSA | LGEHENVEQV  | ASHCATEPFT  | VEMMSEQHCE  | SQ         |            |
| dog                              | RQCLGVDSFE  | LTSNSALLIR | DRDVKSLISR | PQEYQNFKN   | AGAIRVRPSA | LGEHENVERV  | ASHCATEPFT  | VKMMSELHCE  | SQ         |            |
| pig                              | RQCLGVDSFE  | LTSNSALLIR | DRDVKSLISR | PQEYHNFKN   | AGAVRIRPCA | LGEHENVERV  | ASHCGMERFT  | VKMMSEQHCE  | TQ         |            |
| panda                            | RQCLGVDSFE  | LTSNSALLIR | DRDVKSLISH | PQEYHNFKN   | AGAIQVRPSA | LGEHENVERV  | ASHCATEPFT  | VKMMSELHCE  | SQ         |            |
| horse                            | RQCLGVDSFE  | LTSNSALLIR | DRDVKSLISR | PQEYHNFKN   | AGAIRVRPSA | LGEHENVERV  | ASHCGTELFT  | VKMMSEQHCE  | SQ         |            |
| <i>Cynopterus sphinx</i>         | RQCVGVDTFE  | ITRSCILLIG | DRNVKSMISR | PQEYHNFKN   | AVSIRVRPSA | LEEENVERF   | VSHCAMEPFA  | VKTISEQHHE  | IQ         |            |
| <i>Rousettus leschenaultii</i>   | RKYLGVDTFE  | ITRNTALLIR | DRNVKCMISR | PQEYHNFKN   | AEAIRVRSSA | IEQHENVEQF  | VSQCAKEPFT  | VKMMSEQHLE  | SQ         |            |
| <i>Eonycteris spelaea</i>        | RKYLGVDTFV  | ITRNTALFIK | DRNVKCMISR | PQEYHNFKN   | AEAIRVHSSA | LEEENVEQF   | VSHCAMEPFT  | VKMMSEQHHE  | TQ         |            |
| <i>Pteropus vampyrus</i>         | RQCLGMDTFE  | ITHNSALLIG | DPNVKSMISR | PQEYHNFKN   | AESIRVRPSA | LEEENVEQF   | VSLCAIEPFA  | VKMMSEQHHE  | IQ         |            |
| <i>Rhinolophus ferrumequinum</i> | RQCLGVDSFE  | LTSNSALLIK | DRDVKSLISH | PQEYHNFKN   | AGAIRVRPSA | LEEENVERV   | ASHCATEPFT  | VEMMSEKHCE  | SQ         |            |
| <i>Rhinolophus pusillus</i>      | RQCLGVDSFE  | LTSNSALLIK | DRDVKSLISH | PQEYHNFKN   | AGAIRVRPSA | LEEENVERV   | ASHCATEPFT  | VEMMSEKHCE  | SQ         |            |
| <i>Hipposideros armiger</i>      | RQCLGVDSFE  | LNTNSALLIR | NRDVKSLISR | PQEYHNFKN   | AGSIRVRPSA | LEEENVERV   | ASHCATEPFT  | VEMMSEQHCE  | SQ         |            |
| <i>Hipposideros pratti</i>       | RQCLGVDSFE  | LNTNSALLIR | NRDVKSLISR | PQEYHNFKN   | AGSIRVRPSA | LEEENVERV   | ASHCATEPFT  | VEMMSEQHCE  | SQ         |            |
| <i>Megaderma lyra</i>            | RQCLGVDSFE  | LTSNSALLIR | DRDVKSLISR | PQEYHNFKN   | AGAIRVRPSA | LEEENVERV   | ASHCATEPFT  | VEMMSEQHCE  | SQ         |            |
| <i>Megaderma spasma</i>          | RQCLGVDSFE  | LTGHSALLIR | DRDVKSLISR | PQEYHNFKN   | AGAIRVRPSA | LEEENVERV   | ASHCATEPFT  | VEMMSEQHCE  | SQ         |            |
| <i>Myotis ricketti</i>           | RQCLGVGSFE  | LTSNSALLIR | DRDVKSLISR | PQEYHDFKN   | AGAIRVRPSA | LEEENVERV   | ASHCATEPFT  | VEMMSEQHCE  | SP         |            |
| <i>Pipistrellus abramus</i>      | RQCLGVGSFE  | LTTNSALLIR | DRDVKSLISR | PQEYHDFKN   | AGAIRVRPSA | LEEENVERI   | ASHCATEPFT  | VEMMSEQHHE  | SP         |            |
| <i>Scotophilus kuhlii</i>        | RQCLGVGSFE  | LTSNSALLIR | DRDVKSLISR | PQEYHDFKN   | AGAIRVRPSA | LEEENVERV   | ASHCATEPFT  | VEMMSEQHCE  | SP         |            |
| <i>Miniopterus fuliginosus</i>   | RQCLGVDSFE  | LTSNSALLIK | GRDVKSLISR | TQEFQDFKN   | AGAIRVRPSA | LEEENVERV   | ASHCATEPFT  | VEMMSEQHSE  | SH         |            |
| <i>Tadarida plicata</i>          | RQCLGVDSFE  | LTSNSALLIR | DRDVKSLISR | PQEYHNFKN   | AGAIRVRPSA | LEEENVERV   | ASHCATEPFT  | VEMMSEQHCE  | SQ         |            |
| <i>Mormoops megalophylla</i>     | RQCLAVDSFE  | LNSDSALLIR | DRDVKSLISR | PREYHNFKN   | AGAIRIRPLA | LEEENVERI   | ASQLAKEPFT  | VEMMSEQHCE  | SQ         |            |
| <i>Pteronotus parnellii</i>      | RQCLGVDSFE  | LNSNSALLIR | DRDVKSLISR | PQEYHNFKN   | AGAVRVRPSA | LEEENVERV   | ASHCATEPFT  | VEMMSEQHCE  | SQ         |            |
| <i>Desmodus rotundus</i>         | RQCLGVDSFE  | LSSNSALLIR | DRDVESLISR | PQEYQNFKN   | GGAIRVRPSA | LEEENVERV   | ASHCATGPFT  | VEMMSEQHCE  | GQ         |            |
| <i>Leptonycteris yerbabuena</i>  | RQCLGVNSFE  | LNSNSALLVR | DRDVKSLISR | PQEYHNFKN   | AGAIRVRPST | LEEENVERV   | ASHCATEPFT  | VKMMSEQHCE  | SQ         |            |
| <i>Artibeus lituratus</i>        | RQCLGVDSFE  | LNSNSALLIR | DRDVKSLISR | PQEYHNFKN   | AGAIWVRPSA | LKEHENVERV  | ASHCATEPFT  | AEMMSEQHCA  | SQ         |            |
