# Supplementary material for: Relaxed Evolution in the Tyrosine Aminotransferase Gene Tat in Old World Fruit Bats (Chiroptera: Pteropodidae)
Source: PubMed Central journal article supplement (PMC4019583; doi:10.1371/journal.pone.0097483), 2014-05-13
Supplement: pone.0097483.s004.pdf [file pone.0097483.s004.pdf]

|                                  |                                                                                                                                                                     |       |
|----------------------------------|---------------------------------------------------------------------------------------------------------------------------------------------------------------------|-------|
| human                            | ATG GAC CCA TAC ATG ATT CAG ATG AGC AGC AAA GGC AAC CTC CCC TCA ATT CTG GAC GTG CAT GTC AAC GTT GGT GGG AGA AGC TCT GTG CCG GGA AAA ATG AAA GGC AGA AAG GCC AGG     | [120] |
|                                  | M D P Y M I Q M S S K G N L P S I L D V H V N V G G R S S V P G K M K G R K A R                                                                                     | [ 40] |
| mouse                            | ATG GAC TCC TAC GTA ATC CAG ACG AAT GTC AAT GAC AGC CTA CCT TCA GTG CTG GAT GTT CGC GTC AAT ATT GGC GGG AGA AGC TCG GTG CAA GGG AGA GCG AAG GGC AGG AAG GCC AGG     | [120] |
|                                  | M D S Y V I Q T N V N D S L P S V L D V R V N I G G R S S V Q G R A K G R K A R                                                                                     | [ 40] |
| rat                              | ATG GAC TCC TAC GTG ATT CAG ACG GAT GTC GAC GAC AGC TTG TCC TCA GTT CTG GAT GTG CAT GTC AAT ATT GGT GGG AGA AAC TCG GTA CAA GGA AGA AAG AAA GGC AGG AAG GCC AGA     | [120] |
|                                  | M D S Y V I Q T D V D D S L S S V L D V H V N I G G R N S V Q G R K K G R K A R                                                                                     | [ 40] |
| cow                              | ATG GAC CCA TAT GTG ATT CAG ATG CAG GAT CAC GGC AGC CTC CCC TCA GTT CTG GAT GTG CAT GTC AAC GTT GCT GGG AGA AGC TCT GTG CTG GGA AAA GTG AAA AGC AGG AAG GCC AGA     | [120] |
|                                  | M D P Y V I Q M Q D H G S L P S V L D V H V N V A G R S S V L G K V K S R K A R                                                                                     | [ 40] |
| dog                              | ATG GAC CCA TAT GTG ATT GAG ATG AAC AGC AAC AGC AAC CTC CCC TCA GTC CTG GAT GTG CAT GTC AAT ATT GGT GGG AGA AGC TCC TTG CCA GGA AAA ATG AAA GGC AGG AAG GCC AGA     | [120] |
|                                  | M D P Y V I E M N S N S N L P S V L D V H V N I G G R S S L P G K M K G R K A R                                                                                     | [ 40] |
| pig                              | ATG GAC CCC TAC GTG ATT CAG ATG CAC GGC CAT GGC AAC CTC CCC TCC GTT CTG GAT GTG CAT GTC AAC ACT GCT GGT AGA ATC CCT GTG CCA GGA AAA ATG AAA GGC AGG AAG GCC AGA     | [120] |
|                                  | M D P Y V I Q M H G H G N L P S V L D V H V N T A G R I P V P G K M K G R K A R                                                                                     | [ 40] |
| panda                            | ATG GAC CCG TAT GTC ATT CAG ATG AAC AGC AAC AGC AAC CTC CCC TCC GTT CTG GAT GTG CAT GTC AAC ATT GGT GGG CGA AGC TCT TTG CCG GGA AAA ATG AAA GGC AGG AAG GCC AGA     | [120] |
|                                  | M D P Y V I Q M N S N S N L P S V L D V H V N I G G R S S L P G K M K G R K A R                                                                                     | [ 40] |
| horse                            | ATG GAC CCA TAC GTG ATT CAG ATG ACA GGC AGC GGT AAC CTG CCC TCA GTT CTG GAC ATG CAT GTC AAC ATC AGT GGG AGA AGC TCT GCA CCA GGA AAA ATG AAA GGC AGG AAG GCC AGA     | [120] |
|                                  | M D P Y V I Q M T G S G N L P S V L D M H V N I S G R S S A P G K M K G R K A R                                                                                     | [ 40] |
| <i>Cynopterus sphinx</i>         | ATG GAC --- --- --- --- --- --- --- --- AGC AAT GGT GAC CTC CCC TCC ATT CTG GGT GTG CAC ATG CAT ATC AAT GGA AGA AGC TCC GCG CCT GAA AAA GTG AAA GGC AGA AAG CCC AGA | [120] |
|                                  | M D - - - - - - - - S N G D L P S I L G V H M H I N G R S S A P E K V K G R K                                                                                       | [ 40] |
| <i>Rousettus leschenaultii</i>   | ATG GAC --- --- --- --- --- --- --- --- AGC GAT GGT GAC CTC CCC TTC CTT CTG GAT GTG CAT GTC AGC GTC AAC GGA AGA AGC TCC GTG CCT GAA AAA GTG AAA GGC AGA CAG CCC GGA | [120] |
|                                  | M D - - - - - - - - S D G D L P F L L D V H V S V N G R S S V P E K V K G R Q                                                                                       | [ 40] |
| <i>Eonycteris spelaea</i>        | ATG GAC --- --- --- --- --- --- --- --- AGC AGT AGT GAC CTC CCC TTC CTT CTG GAT GTG CAT GTC AGT GTC AGT GGA AGA AGC CCT GTG CCT GAA AAA GTG AAA GGC AGA AAG ACC GAA | [120] |
|                                  | M D - - - - - - - - S S S D L P F L L D V H V S V S G R S P V P E K V K G R K                                                                                       | [ 40] |
| <i>Pteropus vampyrus</i>         | ATG GAC --- --- --- --- --- --- --- --- AGC AAA GGT GAC CTC CCC TCC GTT CTG GAT GTG CAC ATA AAC ATT AAT GGA AGA AGC TCC GTG TCT GAA AAA GTG AAA GGC AGA AAG CCC AGA | [120] |
|                                  | M D - - - - - - - - S K G D L P S V L D V H I N I N G R S S V S E K V K G R K                                                                                       | [ 40] |
| <i>Rhinolophus ferrumequinum</i> | ATG GAC CCG TAC GTG ATC CAG ATG AAC GGC AAC AGC AAC CTC CCC TCC GTT CTG GAT GTT CAT GTT AAC ATC GGT GGG AAA AAC TCC AAG CAG GAA AAA GGG AAA GGC AAG AAG GCC AGG     | [120] |
|                                  | M D P Y V I Q M N G N S N L P S V L D V H V N I G G K N S K Q E K G K G K K A R                                                                                     | [ 40] |
| <i>Rhinolophus pusillus</i>      | ATG GAC CCG TAC ATG ATC CAG ATG AAC GGC AAC GGC AAC CTC CCC TCC GTT CTG GAT GTT CAT GTT AAC ATC GGT GGG AAA AAC TCC AAG CAG GAA AAA GTG AAA GGC AGG AAG GCC AGG     | [120] |
|                                  | M D P Y M I Q M N G N G N L P S V L D V H V N I G G K N S K Q E K V K G R K A R                                                                                     | [ 40] |
| <i>Hipposideros armiger</i>      | ATG GAC CCA TAC GTG ATC CAG ATG AAC AGC AAT GGC AAC TTC CCC TCT GTG CTG GAT GTT CAT GTC AAC ATC GGT GGG AAA AAC TCC AAG CAG GGG AAA GTG AAA GGC AGG AAG GCC AGA     | [120] |
|                                  | M D P Y V I Q M N S N G N F P S V L D V H V N I G G K N S K Q G K V K G R K A R                                                                                     | [ 40] |
| <i>Hipposideros pratti</i>       | ATG GAC CCA TAC GTG ATC CAG ATG AAC AGC AAT GGC AAC TTC CCC TCT GTG TTG GAT GTT CAT GTC AAC ATC GGT GGG AAA AAC TCC AAG CAG GGG AAA GTG AAA GGC AGG AAG GCC AGA     | [120] |
|                                  | M D P Y V I Q M N S N G N F P S V L D V H V N I G G K N S K Q G K V K G R K A R                                                                                     | [ 40] |
| <i>Megaderma lyra</i>            | ATG GAC CCC TAT GTG ATC CAG ATG AAT GGC --- --- ACC CTC CCC TCC GTT CTG GAT GTG CAC GTC AAC ATC GGT GGG AGA AGC TCC ATG CCC GGA AAA GTG AAA GGC CGG AAG GCC AGA     | [120] |
|                                  | M D P Y V I Q M N G - - T L P S V L D V H V N I G G R S S M P G K V K G R K A R                                                                                     | [ 40] |
| <i>Megaderma spasma</i>          | ATG GAC CCC TAT GTG ATC CAG ATG AAT GGC --- --- ACC CTC CCC TCC GTT CTG GAT GTG CAC GTC AAC GTC GAT GGG AGA AGC TCC ATG CCC GGA AAA GCG AGA GGC CGG AAG GCC AGA     | [120] |
|                                  | M D P Y V I Q M N G - - T L P S V L D V H V N V D G R S S M P G K A R G R K A R                                                                                     | [ 40] |
| <i>Myotis ricketti</i>           | ATG GAC CCA TAC GTG ATC GAG ATG AAT GAC AGC GGC GAC CTC CCC TCC GTT CTG GAT GTG CAT GTC AAC GTC GGT GGG AGA AGC TCC ACG CCA GGA AAA GCG AAA GGC AGG AAG GCC CGG     | [120] |
|                                  | M D P Y V I E M N D S G D L P S V L D V H V N V G G R S S T P G K A K G R K A R                                                                                     | [ 40] |
| <i>Pipistrellus abramus</i>      | ATG GAC CCC TAC GTG ATC GAG ATG AAC GGC AGC GGC GAC --- --- --- --- --- --- --- --- CAT GTC AGC GTC GGC GGG AGG AGC TCC ACG CTG GGG AAA GCG AAA GGC CGG AAG GCC CGG | [120] |
|                                  | M D P Y V I E M N G S G D - - - - - - - - H V S V G G R S S T L G K A K G R K A R                                                                                   | [ 40] |
| <i>Scotophilus kuhlii</i>        | ATG GAC CCA TAC ATG ATC GAG ACG AAC GGC AGC GGC GAC CTC CCC TCT GTG CTG GAT GTG CAC GTC --- --- GGC GGG AGA AGC TCC ACG CCA GGG AAA GGG AGA GGC AGG AAG GCC CGG     | [120] |
|                                  | M D P Y M I E T N G S G D L P S V L D V H V - - G G R S S T P G K G R G R K A R                                                                                     | [ 40] |
| <i>Miniopterus fuliginosus</i>   | ATG GAC CCA TAC GTG ATT CAG ATG AAC GGC AGC GGC AAC CTC CCC TCC GTT GTG GAT GTG CAT GTC AAC ATC GGG GGG AGA AGC TCC ATG CCG GGA AAA GCG AAA GGC AGG AAG GCC AGG     | [120] |
|                                  | M D P Y V I Q M N G S G N L P S V V D V H V N I G G R S S M P G K A K G R K A R                                                                                     | [ 40] |
| <i>Tadarida plicata</i>          | ATG GAC CCA TAC GTG ATT CAG ATG AAT GGC AAG AGC CCC CTC CCC TCT GTT CTG GAT GTG CCT GTC AAC ATC GGT GGG AGA AGC TCC ATG CCA GGA AAA GCG AAA GGC AGG AAG GCC AGG     | [120] |
|                                  | M D P Y V I Q M N G K S P L P S V L D V P V N I G G R S S M P G K A K G R K A R                                                                                     | [ 40] |
| <i>Mormoops megalophylla</i>     | ATG GAC CTG TAC GTG ATT CAG ATG AAT GGC AAG GGC AGC CTG CCC CCC GTC CTG GAC GTG CAT GTC AAC ATC GGT GGG AAA AAC TCT CTG CCA GGA AAA GGG AAA GGC AGG AAG GCC AGA     | [120] |
|                                  | M D L Y V I Q M N G K G S L P P V L D V H V N I G G K N S L P G K G K G R K A R                                                                                     | [ 40] |
| <i>Pteronotus parnellii</i>      | ATG GAC CCA TAC CTG ATT CAG ATG AAT GGC ATG GGC AAC CTG CCC TCT GTG CTG GAC GTG CAT GTC AAC GTT GGT GGG AGA AAC TCT ACG CTA GGA AAA GGC AAA GGC AGG AAG GCC AGA     | [120] |
|                                  | M D P Y L I Q M N G M G N L P S V L D V H V N V G G R N S T L G K G K G R K A R                                                                                     | [ 40] |
| <i>Desmodus rotundus</i>         | ATG GAC CCA TAC GTG ATT CAG ATG AAC GGG AAG GGC AGC CTG CCC TCT CTC CTG GAC ATG CAT GTC AAC GTT GGT GGG AAG AAC TCT CAG CCA GGA AAA GGG AAA GGC AGG AAG GCC AGA     | [120] |
|                                  | M D P Y V I Q M N G K G S L P S L L D M H V N V G G K N S Q P G K G K G R K A R                                                                                     | [ 40] |
| <i>Leptonycteris yerbabuena</i>  | ATG GAC CCA TAT GTG ATT CAG ATG AAC AGG AAG GGC AGC CTG CCC TCT CTC CTG GAC ATG CAT GTC AAT GTC GGT GGG AAG AAC TCT CTG CCA GGA AAA GGG AAA GGC AGG AAG GCC AGA     | [120] |
|                                  | M D P Y V I Q M N R K G S L P S L L D M H V N V G G K N S L P G K G K G R K A R                                                                                     | [ 40] |
| <i>Artibeus lituratus</i>        | ATG GAC CCA TAC GTG ATT CAG ATG AAC AGG AAG GGC AGC CTG CCA TCT CTC CTG AAC GTG CAC GTC AAC ATC GGT GGG AAG AAC TCT CTG CCA GGA AAA GGG AAG GGC AGG AAG GCC AGA     | [120] |
|                                  | M D P Y V I Q M N R K G S L P S L L N V H V N I G G K N S L P G K G K G R K A R                                                                                     | [ 40] |

|                                  |                                                                                                                                                                 | K51R  |  |  | F53Y |  |  | V65M K66E |  |  |  |  |  |  |  |  |  |  |  |  |
|----------------------------------|-----------------------------------------------------------------------------------------------------------------------------------------------------------------|-------|--|--|------|--|--|-----------|--|--|--|--|--|--|--|--|--|--|--|--|
| human                            | TGG TCT GTG AGG CCC TCA GAC ATG GCC AAG AAA ACT TTC AAC CCC ATC CGA GCC ATT GTG GAC AAC ATG AAG GTG AAA CCA AAT CCA AAC AAA ACC ATG ATT TCC CTG TCC ATT GGG GAC | [240] |  |  |      |  |  |           |  |  |  |  |  |  |  |  |  |  |  |  |
|                                  | W S V R P S D M A K K T F N P I R A I V D N M K V K P N P N K T M I S L S I G D                                                                                 | [ 80] |  |  |      |  |  |           |  |  |  |  |  |  |  |  |  |  |  |  |
| mouse                            | TGG AAT GTG AGG CCC TCT GAC ATG TCC AAT AAA ACC TTC AAT CCC ATC CGA GCC ATT GTG GAC AAC ATG AAG GTG AAG CCG AAT CCG AAC AAA ACC GTG ATC TCT CTG TCA ATT GGG GAC | [240] |  |  |      |  |  |           |  |  |  |  |  |  |  |  |  |  |  |  |
|                                  | W N V R P S D M S N K T F N P I R A I V D N M K V K P N P N K T V I S L S I G D                                                                                 | [ 80] |  |  |      |  |  |           |  |  |  |  |  |  |  |  |  |  |  |  |
| rat                              | TGG GAC GTG AGA CCC TCT GAC ATG TCC AAT AAG ACC TTC AAT CCC ATC CGA GCC ATC GTG GAC AAC ATG AAG GTG CAG CCC AAT CCG AAC AAG ACC GTG ATT TCT CTG TCA ATT GGG GAC | [240] |  |  |      |  |  |           |  |  |  |  |  |  |  |  |  |  |  |  |
|                                  | W D V R P S D M S N K T F N P I R A I V D N M K V Q P N P N K T V I S L S I G D                                                                                 | [ 80] |  |  |      |  |  |           |  |  |  |  |  |  |  |  |  |  |  |  |
| cow                              | TGG TCC GTG AGG CCC TCG GAC ATG TCC AAC AAA ACT TTC AAT CCC ATC CGG GCC ATT GTG GAC AAC ATG AAG GTG AAG CCA AAT CCA AAC AAG ACC ATG ATT GCT TTG TCG ATT GGG GAC | [240] |  |  |      |  |  |           |  |  |  |  |  |  |  |  |  |  |  |  |
|                                  | W S V R P S D M S N K T F N P I R A I V D N M K V K P N P N K T M I A L S I G D                                                                                 | [ 80] |  |  |      |  |  |           |  |  |  |  |  |  |  |  |  |  |  |  |
| dog                              | TGG TCT GTG AGG CCT TCA GAC ATG TCT AAC AAA ACT TTC AAC CCC ATC CGG GCC ATC GTG GAC AGC TCG AAG GTG AAG CCA AAT CCA AAT AAA GCC ACA ATT GCT CTG TCT ATT GGC GAC | [240] |  |  |      |  |  |           |  |  |  |  |  |  |  |  |  |  |  |  |
|                                  | W S V R P S D M S N K T F N P I R A I V D S S K V K P N P N K A T I A L S I G D                                                                                 | [ 80] |  |  |      |  |  |           |  |  |  |  |  |  |  |  |  |  |  |  |
| pig                              | TGG TCC GTG AGG CCC TCG GAC ATG TCC AAC AAG ACT TGC AAT CCC ATC CGG GCC ATC GTG GAC AGC ATG AAG GTG AAA CCG AAC CCA AAC AAG ACC ACA ATA TCT CTG TCA ATT GGG GAC | [240] |  |  |      |  |  |           |  |  |  |  |  |  |  |  |  |  |  |  |
|                                  | W S V R P S D M S N K T C N P I R A I V D S M K V K P N P N K T T I S L S I G D                                                                                 | [ 80] |  |  |      |  |  |           |  |  |  |  |  |  |  |  |  |  |  |  |
| panda                            | TGG TCC GTG AAG CCT TCA GAT ATG TCC AAC AAA ACT TTC AAT CCC ATC CGA GCC ATT GTG GAC AGC ATG AAG GTG AAG CCA AAT CCA AAC AAA ACC ATG ATC GCT CTG TCA ATT GGG GAC | [240] |  |  |      |  |  |           |  |  |  |  |  |  |  |  |  |  |  |  |
|                                  | W S V K P S D M S N K T F N P I R A I V D S M K V K P N P N K T M I A L S I G D                                                                                 | [ 80] |  |  |      |  |  |           |  |  |  |  |  |  |  |  |  |  |  |  |
| horse                            | TGG TCC GTG AGG CCC TCA GAC ATG TCC AAC AAA ACT TTC AAT CCC ATC CGG GCC ATC GTG GAC AAC ATG AAG GTG AAA CCA AAC CCA AAC AAA ACC ATG ATT GCT CTG TCA ATT GGG GAC | [240] |  |  |      |  |  |           |  |  |  |  |  |  |  |  |  |  |  |  |
|                                  | W S V R P S D M S N K T F N P I R A I V D N M K V K P N P N K T M I A L S I G D                                                                                 | [ 80] |  |  |      |  |  |           |  |  |  |  |  |  |  |  |  |  |  |  |
| <i>Cynopterus sphinx</i>         | TGG TCC GTG AAG CCC TCA GAC ATG GCC AAC AGA ACT TAC AAT CCC ATC CGG GCC ATA GTG GAC AGC ATG AAG ATG GAG CCA AAC CCA GAC AAA ACC ACG ATT ACC CTG TCC ATA GGG GAC | [240] |  |  |      |  |  |           |  |  |  |  |  |  |  |  |  |  |  |  |
|                                  | W S V K P S D M A N R T Y N P I R A I V D S M K M E P N P D K T T I T L S I G D                                                                                 | [ 80] |  |  |      |  |  |           |  |  |  |  |  |  |  |  |  |  |  |  |
| <i>Rousettus leschenaultii</i>   | TGG TCT GTG AGG CCC TCG GAC ATG GCC AAC AGA ACT TAC AAT CCC ATC CGG GCC ATA GTG GAC AAC ATG AAG TTG GAA CCA AAC CCA GAC AAA CCC ATG ATT TCC CTG TCC CTT GGG GAC | [240] |  |  |      |  |  |           |  |  |  |  |  |  |  |  |  |  |  |  |
|                                  | W S V R P S D M A N R T Y N P I R A I V D N M K L E P N P D K P M I S L S L G D                                                                                 | [ 80] |  |  |      |  |  |           |  |  |  |  |  |  |  |  |  |  |  |  |
| <i>Eonycteris spelaea</i>        | TGG TCT GTG AGG CCC TCG GAC ATG GCC AAC AGA ACT TAC AAT CCC ATC CGG GCC ATA GTG GAC AGC ATG AAG ATG GAA CCA AAC CCA GAC AAA ACC ACG ATT GCC CTG TCC ATT GGG GAC | [240] |  |  |      |  |  |           |  |  |  |  |  |  |  |  |  |  |  |  |
|                                  | W S V R P S D M A N R T Y N P I R A I V D S M K M E P N P D K T T I A L S I G D                                                                                 | [ 80] |  |  |      |  |  |           |  |  |  |  |  |  |  |  |  |  |  |  |
| <i>Pteropus vampyrus</i>         | TGG TCT GTG AGG CCC TCG GAC ATG GCC AAC AGA ACT TAC AAT CCC ATC CGG GCC ATA GTG GAC AGC ATG AAG ATG GAG CCC AAC CCA GAC AAA ACC ACG ATT CCC CTG TCC ATT GGG GAC | [240] |  |  |      |  |  |           |  |  |  |  |  |  |  |  |  |  |  |  |
|                                  | W S V R P S D M A N R T Y N P I R A I V D S M K M E P N P D K T T I P L S I G D                                                                                 | [ 80] |  |  |      |  |  |           |  |  |  |  |  |  |  |  |  |  |  |  |
| <i>Rhinolophus ferrumequinum</i> | TGG TCT GTG AGG CCC TCG GAC ATG GCC AAC AAT ACT TTC AAT CCC ATC CGG ACC ATC GTG GAC AAC ATG AAG GTG AAG CCA AAC CCA CAC AAA ACC ATG ATT GCT CTG TCA ATT GGG GAC | [240] |  |  |      |  |  |           |  |  |  |  |  |  |  |  |  |  |  |  |
|                                  | W S V R P S D M A N N T F N P I R T I V D N M K V K P N P H K T M I A L S I G D                                                                                 | [ 80] |  |  |      |  |  |           |  |  |  |  |  |  |  |  |  |  |  |  |
| <i>Rhinolophus pusillus</i>      | TGG TCT GTG AAG CCT TCG GAC ATG TCC AAC AAA ACT TTC AAT CCC ATC CGG ACC ATC GTG GAC AAC ATG AAG GTG AAG CCA AAC CCA GAC AAA GCC ATG ATT GCT CTG TCA ATT GGG GAC | [240] |  |  |      |  |  |           |  |  |  |  |  |  |  |  |  |  |  |  |
|                                  | W S V K P S D M S N K T F N P I R T I V D N M K V K P N P D K A M I A L S I G D                                                                                 | [ 80] |  |  |      |  |  |           |  |  |  |  |  |  |  |  |  |  |  |  |
| <i>Hipposideros armiger</i>      | TGG TCC GTG AAG CCC TCG GAA ATG TCC AAC AAA ACT TTC AAT CCC ATC CGG ACC ATC GTA GAT GGC ATG AAG GTG AAG CCA AAC CCA AAC AAA ACC ATG ATT TCT CTG TCA ATC GGG GAC | [240] |  |  |      |  |  |           |  |  |  |  |  |  |  |  |  |  |  |  |
|                                  | W S V K P S E M S N K T F N P I R T I V D G M K V K P N P N K T M I S L S I G D                                                                                 | [ 80] |  |  |      |  |  |           |  |  |  |  |  |  |  |  |  |  |  |  |
| <i>Hipposideros pratti</i>       | TGG TCC GTG AAG CCC TCG GAA ATG TCC AAC AAA ACT TTC AAT CCC ATC CGG ACC ATC GTA GAT GGC ATG AAG GTG AAG CCA AAC CCA AAC AAA ACC ATG ATT TCT CTG TCA ATC GGG GAC | [240] |  |  |      |  |  |           |  |  |  |  |  |  |  |  |  |  |  |  |
|                                  | W S V K P S E M S N K T F N P I R T I V D G M K V K P N P N K T M I S L S I G D                                                                                 | [ 80] |  |  |      |  |  |           |  |  |  |  |  |  |  |  |  |  |  |  |
| <i>Megaderma lyra</i>            | TGG TCC GTG AAG CCC TCG GAC ATG TCC AAC AAA ACC TTC AAT CCC ATC CGG ACC ATC GTG GAC AGC ATG AAG GTG AAG CCA AAC CCA GAT AAA GCC ATG ATT GCT CTG TCA ATT GGG GAC | [240] |  |  |      |  |  |           |  |  |  |  |  |  |  |  |  |  |  |  |
|                                  | W S V K P S D M S N K T F N P I R T I V D S M K V K P N P D K A M I A L S I G D                                                                                 | [ 80] |  |  |      |  |  |           |  |  |  |  |  |  |  |  |  |  |  |  |
| <i>Megaderma spasma</i>          | TGG TCC GTG AAG CCC TCG GAC ATG TCC AAC AAC ACT TTC AAT CCC ATC CGG ACC ATC GTA GAC AGC ATG AAG GTG AAG CCA AAC CCA GAT AAA GCC ATG ATT GCT CTG TCA ATC GGG GAC | [240] |  |  |      |  |  |           |  |  |  |  |  |  |  |  |  |  |  |  |
|                                  | W S V K P S D M S N N T F N P I R T I V D S M K V K P N P D K A M I A L S I G D                                                                                 | [ 80] |  |  |      |  |  |           |  |  |  |  |  |  |  |  |  |  |  |  |
| <i>Myotis ricketti</i>           | TGG TCT GTG AAG CCC TCG GAC ATG TCC AAC AAC ACT TTC AAT CCC ATA CGG GCC ATC GTG GAC AGC ATG AAG GTG AAG CCA AAC CCG GAC AAA ACC ATG ATT TCT CTG TCA ATT GGG GAC | [240] |  |  |      |  |  |           |  |  |  |  |  |  |  |  |  |  |  |  |
|                                  | W S V K P S D M S N N T F N P I R A I V D S M K V K P N P D K T M I S L S I G D                                                                                 | [ 80] |  |  |      |  |  |           |  |  |  |  |  |  |  |  |  |  |  |  |
| <i>Pipistrellus abramus</i>      | TGG TCG GTG AAG CCC TCG GAC ATG GCC AAC AAC ACT TTC AAT CCC ATC CGG GCC ATC GTG GAC AGC ATG AAG GTG AAG CCG AAC CCA GAC AAA ACC ATG ATT TCT CTG TCC ATC GGC GAC | [240] |  |  |      |  |  |           |  |  |  |  |  |  |  |  |  |  |  |  |
|                                  | W S V K P S D M A N N T F N P I R A I V D S M K V K P N P D K T M I S L S I G D                                                                                 | [ 80] |  |  |      |  |  |           |  |  |  |  |  |  |  |  |  |  |  |  |
| <i>Scotophilus kuhlii</i>        | TGG TCT GTG AAG CCC TCG GAC ATG TCC AAC AAC ACT TTC AAT CCC ATC CGG GCC ATC GTG GAC AGC ATG AAG GTG AAG CCA AAC CCG GAC AAA GCC ATG ATT TCT CTG TCA ATT GGG GAC | [240] |  |  |      |  |  |           |  |  |  |  |  |  |  |  |  |  |  |  |
|                                  | W S V K P S D M S N N T F N P I R A I V D S M K V K P N P D K A M I S L S I G D                                                                                 | [ 80] |  |  |      |  |  |           |  |  |  |  |  |  |  |  |  |  |  |  |
| <i>Miniopterus fuliginosus</i>   | TGG TCC GTG AAG CCC TCG GAC ATG TCC AAC AAA ACT TTC AAT CCC ATC CGG GCC ATC GTG GAA AGC ATG AAG GTG AAG CCA AAC CCA GAC AAA ACC ATG ATT TCT CTG TCA ATT GGG GAC | [240] |  |  |      |  |  |           |  |  |  |  |  |  |  |  |  |  |  |  |
|                                  | W S V K P S D M S N K T F N P I R A I V E S M K V K P N P D K T M I S L S I G D                                                                                 | [ 80] |  |  |      |  |  |           |  |  |  |  |  |  |  |  |  |  |  |  |
| <i>Tadarida plicata</i>          | TGG TCC GTG AAG CCC TCG GAA ATG TCC AAG AAC ACT TTC AAT CCC ATC CGG GCC ATT GTG GAC AGC ATG AAG GTG AAG CCA AAC CCA GAC AAA ACC ATG ATT TCT CTG TCA ATT GGG GAC | [240] |  |  |      |  |  |           |  |  |  |  |  |  |  |  |  |  |  |  |
|                                  | W S V K P S E M S K N T F N P I R A I V D S M K V K P N P D K T M I S L S I G D                                                                                 | [ 80] |  |  |      |  |  |           |  |  |  |  |  |  |  |  |  |  |  |  |
| <i>Mormoops megalophylla</i>     | TGG TCT GTG AAG CCC TCG GAC ATG TCC AAC AAT ACT TTC AAT CCC ATC CGG GCC ATT GTG GAC AGC ATG AAG GTG AAG CCA AAT CCA GAC AAA CCC ATG ATT TCT CTG TCA ATT GGG GAC | [240] |  |  |      |  |  |           |  |  |  |  |  |  |  |  |  |  |  |  |
|                                  | W S V K P S D M S N N T F N P I R A I V D S M K V K P N P D K P M I S L S I G D                                                                                 | [ 80] |  |  |      |  |  |           |  |  |  |  |  |  |  |  |  |  |  |  |
| <i>Pteronotus parnellii</i>      | TGG TCT GTG AAG CCC TCG GAC ATG TCC AAC AAT ACA TTT AAT CCC ATC CGG GCC ATT GTG GAC AGC ATG AAG GTG AAG CCA AAC CCA GAC AAA ACC ATG ATC TCT CTG TCA ATT GGG GAC | [240] |  |  |      |  |  |           |  |  |  |  |  |  |  |  |  |  |  |  |
|                                  | W S V K P S D M S N N T F N P I R A I V D S M K V K P N P D K T M I S L S I G D                                                                                 | [ 80] |  |  |      |  |  |           |  |  |  |  |  |  |  |  |  |  |  |  |
| <i>Desmodus rotundus</i>         | TGG TCC GTG AAG CCC TCG GAC ATG GCC AAC AAC ACC TTC AAT CCT ATC CGT GAC ATT GTG GAC GGC ATG AAG GTG AAG CCA AAC CCA GCC AAA GCC ATG ATT TCT CTG TCA ATT GGG GAC | [240] |  |  |      |  |  |           |  |  |  |  |  |  |  |  |  |  |  |  |
|                                  | W S V K P S D M A N N T F N P I R D I V D G M K V K P N P A K A M I S L S I G D                                                                                 | [ 80] |  |  |      |  |  |           |  |  |  |  |  |  |  |  |  |  |  |  |
| <i>Leptonycteris yerbabuena</i>  | TGG TCC GTG AAG CCC TCA GAC ATG GCC AAC AAC ACT TTC AAT CCC ATC CGC GCC ATT GTG GAC AAC ATG AAG GTG AAG CCA AAC CCA GAC AAA ACC ATG ATT TCT CTG TCA ATT GGG GAC | [240] |  |  |      |  |  |           |  |  |  |  |  |  |  |  |  |  |  |  |
|                                  | W S V K P S D M A N N T F N P I R A I V D N M K V K P N P D K T M I S L S I G D                                                                                 | [ 80] |  |  |      |  |  |           |  |  |  |  |  |  |  |  |  |  |  |  |
| <i>Artibeus lituratus</i>        | TGG TCC GTG AAA CCT TCG GCC ATG GCC AAC AAC ACT TTC AAT CCC ATC CGT GCC ATT GTG GAC AGC ATG AAG GTG AAG CCA AAC CCA GAC AAA ACC ATG ATT TCT CTG TCA ATT GGG GAC | [240] |  |  |      |  |  |           |  |  |  |  |  |  |  |  |  |  |  |  |
|                                  | W S V K P S A M A N N T F N P I R A I V D S M K V K P N P D K T M I S L S I G D                                                                                 | [ 80] |  |  |      |  |  |           |  |  |  |  |  |  |  |  |  |  |  |  |



|                                  |                                                                                                                                                                       |
|----------------------------------|-----------------------------------------------------------------------------------------------------------------------------------------------------------------------|
| human                            | GAG ATT GCT TCT TAT TAC CAC TGT CCT GAG GCA CCC CTA GAA GCT AAG GAC GTC ATT CTG ACA AGT GGC TGC AGC CAA GCT ATT GAC CTT TGT TTA GCT GTG TTG GCC AAC CCA GGG CAA [480] |
|                                  | E I A S Y Y H C P E A P L E A K D V I L T S G C S Q A I D L C L A V L A N P G Q [160]                                                                                 |
| mouse                            | GAG GTC GCT TCC TAT TAC CAC TGT CCT GAG GCT CCT CTG GAA GCT AAG GAT GTC ATT CTG ACG AGT GGC TGC AGT CAG GCC ATT GAG CTG TGT CTA GCC GTG TTG GCC AAT CCT GGA CAG [480] |
|                                  | E V A S Y Y H C P E A P L E A K D V I L T S G C S Q A I E L C L A V L A N P G Q [160]                                                                                 |
| rat                              | GAG GTC GCT TCT TAC TAC CAC TGT CAT GAG GCT CCT CTG GAA GCT AAG GAT GTC ATT CTG ACA AGC GGC TGC AGT CAG GCC ATT GAG CTA TGT CTA GCT GTG TTG GCC AAT CCT GGA CAA [480] |
|                                  | E V A S Y Y H C H E A P L E A K D V I L T S G C S Q A I E L C L A V L A N P G Q [160]                                                                                 |
| cow                              | GAA GTT GCT TCT TAT TAC CAC TGT CCC GAG GCA CCC CTG GAA GCT AAG GAT GTC ATT CTG ACA AGT GGC TGC AGT CAG GCT ATT GAA CTG TGT TTG GCT GTG TTG GCC AAC CCA GGG CAA [480] |
|                                  | E V A S Y Y H C P E A P L E A K D V I L T S G C S Q A I E L C L A V L A N P G Q [160]                                                                                 |
| dog                              | GAG ATT GCT TCG TAT TAC CAC CGG CCC GAG GCA CCC CTG GAA GCT AAG GAT GTC ATT CTG ACC AGT GGC TGC AGT CAG GCT ATT GAA CTT TGT TTA GCT GTA TTG GCT AAT CCA GGA CAA [480] |
|                                  | E I A S Y Y H R P E A P L E A K D V I L T S G C S Q A I E L C L A V L A N P G Q [160]                                                                                 |
| pig                              | GAG GTT GCT TCT TAT TAC CAC TGT CCG GAG GCA CCC CTG GAA GCT AAG GAT GTC ATT CTG ACA AGC GGC TGC AGT CAG GCT ATT GAA CTT TGT TTA GCT GTG TTG GCT AAC CCG GGC CAA [480] |
|                                  | E V A S Y Y H C P E A P L E A K D V I L T S G C S Q A I E L C L A V L A N P G Q [160]                                                                                 |
| panda                            | GAG ATT GCT TCT TAC TAC CAC CGG CCT GAG GCT CCC CTG GAA GCT AAG GAT GTC ATT CTG ACT AGT GGC TGC AGT CAG GCT ATT GAA CTT TGT TTA GCT GTG TTG GCC AAC CCA GGA CAA [480] |
|                                  | E I A S Y Y H R P E A P L E A K D V I L T S G C S Q A I E L C L A V L A N P G Q [160]                                                                                 |
| horse                            | GAG ATC GCT TCT TAT TAC CAT CAT CCC GAG GCA CCT CTG GAA GCT AAG GAT GTC ATT CTG ACA AGT GGC TGC AGT CAG GCT ATT GAA CTT TGT TTA GCT GTG TTG GCC AAC CCA GGG CAA [480] |
|                                  | E I A S Y Y H H P E A P L E A K D V I L T S G C S Q A I E L C L A V L A N P G Q [160]                                                                                 |
| <i>Cynopterus sphinx</i>         | GAG GTT GCT TCT TAT TTC CGC TGT CCC GAG GCC CCC CTG GAA GCT AAG GAT GTC ATT CTG ACA AGT GGC TGC AGT CAG GCT GTT GAA CTT TGT TTA GCT GTG TTG GCC AAC CCA GGG CAA [480] |
|                                  | E V A S Y F R C P E A P L E A K D V I L T S G C S Q A V E L C L A V L A N P G Q [160]                                                                                 |
| <i>Rousettus leschenaultii</i>   | GAG ATT GCT TCT TAT TAC CAC CAT CCC AAG GCA CCC CTG GAA GCT AAG GAC GTC ATT CTG ACA TGT GGC TGC AGT CAG GCT ATT GAA CTT TGT TTA GCT GTG TTG GCC AAC CCA GGG CAA [480] |
|                                  | E I A S Y Y H H P K A P L E A K D V I L T C G C S Q A I E L C L A V L A N P G Q [160]                                                                                 |
| <i>Eonycteris spelaea</i>        | GAG GTT GCT TCT TAT TAC CAC CAT CCC AAG GCA CCC CTG GAA GCT AAG GAT GTC ATT CTG ACA TGT GGC TGC AGT CAG GCT ATT GAA CTT TGT TTA ACT GTG TTG GCC AAC CCA GGG CAA [480] |
|                                  | E V A S Y Y H H P K A P L E A K D V I L T C G C S Q A I E L C L T V L A N P G Q [160]                                                                                 |
| <i>Pteropus vampyrus</i>         | GAG ATT GCT TCT TAT TAC CAC CGT CCC GAG GCA CCT CTG GAA GCT AAG GAT GTT ATT CTG ACA AGT GGC TGC AGT CAG GCT ATT GAA CTT TGT TTA GCT GTG TTG GCC AAC CCA GGG CAA [480] |
|                                  | E I A S Y Y H R P E A P L E A K D V I L T S G C S Q A I E L C L A V L A N P G Q [160]                                                                                 |
| <i>Rhinolophus ferrumequinum</i> | GAG ATT GCT TCT TAT TAC CAC TGT CCT GAG GCA CCC CTG GAG GCT AAT GAT GTC ATT CTG ACA AGT GGC TGC GGT CAG GCT ATT GAA CTT TGT TTA GCT GTG TTG GCC AAC CCA GGG CAA [480] |
|                                  | E I A S Y Y H C P E A P L E A N D V I L T S G C G Q A I E L C L A V L A N P G Q [160]                                                                                 |
| <i>Rhinolophus pusillus</i>      | GAG ATT GCT TCT TAT TAC CAC TGT CCT GAG GCA CCC CTG GAG GCC AAG GAT GTC ATT CTG ACA AGT GGC TGC AGT CAG GCT ATT GAA CTT TGT TTA GCT GTG TTG GCC AAC CCA GGG CAA [480] |
|                                  | E I A S Y Y H C P E A P L E A K D V I L T S G C S Q A I E L C L A V L A N P G Q [160]                                                                                 |
| <i>Hipposideros armiger</i>      | GAG GTT GCT TCT TAT TAC CAC TGT CCC GAG GCA CCC CTG GAA GCT AAG GAT GTC ATT CTG ACA AGT GGC TGC AGT CAG GCT ATT GAA CTT TGC TTA GCT GTG TTG GCC AAC CCA GGG CAA [480] |
|                                  | E V A S Y Y H C P E A P L E A K D V I L T S G C S Q A I E L C L A V L A N P G Q [160]                                                                                 |
| <i>Hipposideros pratti</i>       | GAG GTT GCT TCT TAT TAC CAC TGT CCC GAG GCA CCC CTG GAA GCT AAG GAT GTC ATT CTG ACA AGT GGC TGC AGT CAG GCT ATT GAA CTT TGC TTA GCT GTG TTG GCT AAC CCA GGG CAA [480] |
|                                  | E V A S Y Y H C P E A P L E A K D V I L T S G C S Q A I E L C L A V L A N P G Q [160]                                                                                 |
| <i>Megaderma lyra</i>            | GAG ATT GCT TCT TAT TAC CAC TGT CCT GAG GCA CCC CTG GAA GCT AAG GAT ATC ATT CTG ACA AGT GGC TGC AGT CAA GCT ATT GAA CTT TGT CTA GCT GTG TTG GCC AAC CCA GGG CAA [480] |
|                                  | E I A S Y Y H C P E A P L E A K D I I L T S G C S Q A I E L C L A V L A N P G Q [160]                                                                                 |
| <i>Megaderma spasma</i>          | GAG ATT GCT TCT TAT TAC CAC TGT CCT GAG GCA CCC CTG GAA GCA AAG GAT GTC ATT CTG ACA AGC GGC TGC AGT CAG GCT ATT GAA CTT TGT TTA GCT GTG TTG GCC AAC CCA GGG CAA [480] |
|                                  | E I A S Y Y H C P E A P L E A K D V I L T S G C S Q A I E L C L A V L A N P G Q [160]                                                                                 |
| <i>Myotis ricketti</i>           | GAG GTC GCG TCC TAT TAC CAC TGT CCC GAG GCA CCC CTG GAA GCT AAG GAT GTC ATT CTG ACA AGT GGC TGC AGT CAG GCT ATT GAA CTT TGT TTA GCT GTG TTG GCC AAC CCA GGG CAA [480] |
|                                  | E V A S Y Y H C P E A P L E A K D V I L T S G C S Q A I E L C L A V L A N P G Q [160]                                                                                 |
| <i>Pipistrellus abramus</i>      | GAG GTT GCC TCC TAT TAC CAC TGT CCC GAG GCA CCC CTG GAA GCT AAG GAT GTC ATT CTG ACA AGT GGC TGC AGT CAG GCT ATT GAA CTT TGC TTA GCT GTG TTG GCC AAC CCA GGG CAA [480] |
|                                  | E V A S Y Y H C P E A P L E A K D V I L T S G C S Q A I E L C L A V L A N P G Q [160]                                                                                 |
| <i>Scotophilus kuhlii</i>        | GAG GTT GCC TCC TAT TAC CAC TGT CCC GAG GCT CCC CTG GAA GCT GAG GAT GTC ATT CTG ACA AGT GGC TGC AGT CAG GCT ATT GAA CTT TGT TTA GCT GTG TTG GCC AAC CCA GGG CAA [480] |
|                                  | E V A S Y Y H C P E A P L E A E D V I L T S G C S Q A I E L C L A V L A N P G Q [160]                                                                                 |
| <i>Miniopterus fuliginosus</i>   | GAA ATT GCT TCT TAC TAC CAC TGC CCC GAG GCG CCC TTG GAA GCT AAG GAT GTC ATT CTG ACA AGT GGC TGC AGT CAG GCT ATT GAA CTG TGT TTA GCT GTG TTG GCC AAC CCA GGG CAA [480] |
|                                  | E I A S Y Y H C P E A P L E A K D V I L T S G C S Q A I E L C L A V L A N P G Q [160]                                                                                 |
| <i>Tadarida plicata</i>          | GAG ATT GCC TCT TAC TAC CAC TGT CCC GAG GCA CCC CTG GAA GCT AAG GAT GTC ATT CTG ACA AGT GGC TGC AGT CAG GCT ATT GAA CTT TGT TTA GCT GTG TTG GCC AAC CCA GGG CAA [480] |
|                                  | E I A S Y Y H C P E A P L E A K D V I L T S G C S Q A I E L C L A V L A N P G Q [160]                                                                                 |
| <i>Mormoops megalophylla</i>     | GAG ATT GCT TCT TAT TAC CAC TGT CCC GAG GCA CCC CTG GAA GCT AAG GAT GTC ATT CTA ACA AGT GGC TGC AGT CAG GCT ATT GAA CTT TGT TTA GCA GTG CTG GCC AAC CCA GGG CAG [480] |
|                                  | E I A S Y Y H C P E A P L E A K D V I L T S G C S Q A I E L C L A V L A N P G Q [160]                                                                                 |
| <i>Pteronotus parnellii</i>      | GAG ATT GCT TCT TTT TAC CAC TGT CCC GAG GCA CCC CTG GAA GCT AAG GAT GTC ATT CTG ACC AGT GGC TGC AGT CAG GCT ATT GAA CTT TCT TTA GCA GTG TTG GCC AAC CCA GGG CAG [480] |
|                                  | E I A S F Y H C P E A P L E A K D V I L T S G C S Q A I E L S L A V L A N P G Q [160]                                                                                 |
| <i>Desmodus rotundus</i>         | GAG ATT GTT TCT TAT CAC CAC TGT CCC GAG GCA CCC CTG GAA GCT AAG GAT GTC ATT CTG ACA AGT GGC TGC AGT CAG GCC ATT GAA CTT TGT TTA GCA GTG CTG GCC AAT CCG GGG CAG [480] |
|                                  | E I V S Y H H C P E A P L E A K D V I L T S G C S Q A I E L C L A V L A N P G Q [160]                                                                                 |
| <i>Leptonycteris yerbabuena</i>  | GAT ATT GCT TCT TAT TAC CAC TGT CCC GAG GCA CCC CTG GAA GCT AAG GAT GTC CTT CTG ACA AGT GGC TGC AGT CAG GCC ATT GAA CTT TGT TTA GCA GTG TTG GCC AAC CCA GGG CAG [480] |
|                                  | D I A S Y Y H C P E A P L E A K D V L L T S G C S Q A I E L C L A V L A N P G Q [160]                                                                                 |
| <i>Artibeus lituratus</i>        | GAG ATT GCT TCT TAT TAC CAC TGT CCC GAG GCA CCC CTG GAA GCT AAG GAT GTC ATT CTG ACA AGT GGC TGC AGT CAG GCC ATT GAA CTT TGT TTA GCA GTG CTG GCC AGC CCA GGG CAG [480] |
|                                  | E I A S Y Y H C P E A P L E A K D V I L T S G C S Q A I E L C L A V L A S P G Q [160]                                                                                 |



|                                  |                                                                                                                                                                       |
|----------------------------------|-----------------------------------------------------------------------------------------------------------------------------------------------------------------------|
| human                            | CTG GAA TAT CTA ATT GAT GAA AAG ACA GCT TGT CTC ATT GTC AAT AAT CCA TCA AAC CCC TGT GGG TCA GTG TTC AGC AAA CGT CAT CTT CAG AAG ATT CTG GCA GTG GCT GCA CGG CAG [720] |
|                                  | L E Y L I D E K T A C L I V N N P S N P C G S V F S K R H L Q K I L A V A A R Q [240]                                                                                 |
| mouse                            | CTG GAA TCT CTG ATC GAC GAA AAA ACA GCT TGT CTC GTG GTC AAC AAC CCG TCC AAT CCC TGT GGC TCT GTG TTC AGT AAG CGG CAC CTT CAG AAG ATT TTG GCA GTG GCT GAA AGG CAA [720] |
|                                  | L E S L I D E K T A C L V V N N P S N P C G S V F S K R H L Q K I L A V A E R Q [240]                                                                                 |
| rat                              | CTG GAA TCT CTG ATC GAT GAA AAA ACA GCG TGT CTT GTT GTC AAC AAC CCA TCC AAT CCC TGT GGC TCC GTG TTC AGT AAG CGG CAC CTT CAG AAG ATT TTG GCA GTG GCT GAA AGG CAG [720] |
|                                  | L E S L I D E K T A C L V V N N P S N P C G S V F S K R H L Q K I L A V A E R Q [240]                                                                                 |
| cow                              | TTA GAA TCT CTG ATT GAT GAA AAG ACA GTT TGT CTT ATT GTC AAC AAT CCA TCA AAC CCT TGT GGG TCA GTG TTC AGT AGA CGT CAT CTC CAG AAA ATT TTG GCA GTG GCT GCA AGG CAA [720] |
|                                  | L E S L I D E K T V C L I V N N P S N P C G S V F S R R H L Q K I L A V A A R Q [240]                                                                                 |
| dog                              | CTG GAA TCT CTG ATT GAT GAA AAG ACA GCT TGT CTC ATT GTT AAT AAT CCA TCA AAC CCC TGT GGG TCA GTG TTC AGT AAA AGT CAT CTC CAG AAA ATT CTG GCT GTG GCT GCA AGG CAG [720] |
|                                  | L E S L I D E K T A C L I V N N P S N P C G S V F S K S H L Q K I L A V A A R Q [240]                                                                                 |
| pig                              | CTA GAG TCT CTG ATT GAT GAA AAG ACA GCT TGT CTT GTC GTC AAT AAT CCA TCA AAC CCT TGT GGG TCA GTG TTC AGT AGA AAT CAT CTC CAG AAA ATT TTG GCA GTG GCC ACC AGG CAG [720] |
|                                  | L E S L I D E K T A C L V V N N P S N P C G S V F S R N H L Q K I L A V A T R Q [240]                                                                                 |
| panda                            | CTG GAA TCT TTG ATT GAT GAA AAG ACA GCT TGT CTC ATT GTT AAT AAT CCA TCA AAC CCC TGT GGG TCA GTG TTC AGT AAA AGT CAT CTC CAG AAA ATT CTG GCT GTG GCT GCA AAG CAG [720] |
|                                  | L E S L I D E K T A C L I V N N P S N P C G S V F S K S H L Q K I L A V A A K Q [240]                                                                                 |
| horse                            | GTA GAA TCT CTG GTT GAT GAA AAG ACA GCT TGT CTC ATT GTC AAC AAT CCA TCA AAC CCC TGT GGG TCA GTG TTC AGT AAA AGT CAT CTC CAG AAA ATT CTG GCA GTG GCC GCA AGG CAG [720] |
|                                  | V E S L V D E K T A C L I V N N P S N P C G S V F S K S H L Q K I L A V A A R Q [240]                                                                                 |
| <i>Cynopterus sphinx</i>         | TTG GAA TCA CTG ATT GAT GAA AAG ACA GCT TGT CTC ATT GTC AAC AAC CCA TCA AAC CCC TGT GGG TCA GTG TTC AGT AAA AGT CAC CTC CAG GAT ATT CTG GCT GTG GCT GCA AGG CAG [720] |
|                                  | L E S L I D E K T A C L I V N N P S N P C G S V F S K S H L Q D I L A V A A R Q [240]                                                                                 |
| <i>Rousettus leschenaultii</i>   | ATG GAA TCA CTG ATC GAT GAA AAG ACA GCT TGT CTC ATT GTC AAC AAT CCA TCA AAC CCC TGT GGG TCA GTG TTC AGT AAA AGT CAC CTC CAG GAT ATT CTG GCT GTG GCT GCA AGG AAG [720] |
|                                  | M E S L I D E K T A C L I V N N P S N P C G S V F S K S H L Q D I L A V A A R K [240]                                                                                 |
| <i>Eonycteris spelaea</i>        | TTG GAA TCA CTG ATC GAT GAA AAG ACA GCT TGT CTC ATT GTC AAC AAT CCA TCA AAC CCC TGT GGG TCA GTG TTC AGT AAA AGT CAC CTC CAG GAT ATT CTG GCA GTG GCT GCA AGG AAG [720] |
|                                  | L E S L I D E K T A C L I V N N P S N P C G S V F S K S H L Q D I L A V A A R K [240]                                                                                 |
| <i>Pteropus vampyrus</i>         | TTG GAA TCA CTG ATT GAC GAA AAG ACA GCT TGT CTC ATT GTC AAC AAT CCA TCA AAC CCC TGT GGG TCA GTG TTC AGT AAA AGT CAC CTC CAG GAT ATT CTG GCT GTG GCT GCA AGG CAG [720] |
|                                  | L E S L I D E K T A C L I V N N P S N P C G S V F S K S H L Q D I L A V A A R Q [240]                                                                                 |
| <i>Rhinolophus ferrumequinum</i> | TTA AAA TCT CTG ATT GAT GAA AAG ACA GCT TGT CTC ATT GTC AAC AAC CCA TCA AAT CCC TGT GGG TCA GTG TTT AGT AAA AAT CAT CTC CAG AAG ATT CTG GCC GTG GCT GCA AGG CAG [720] |
|                                  | L K S L I D E K T A C L I V N N P S N P C G S V F S K N H L Q K I L A V A A R Q [240]                                                                                 |
| <i>Rhinolophus pusillus</i>      | TTA GAA TCT CTG ATT GAT GAA AAG ACA GCT TGT CTC ATT GTC AAC AAC CCA TCA AAC CCC TGT GGG TCA GTG TTT AGT ACA AAT CAT CTC CAG AAG ATT CTG GCC GTG GCT GCA AGG CAG [720] |
|                                  | L E S L I D E K T A C L I V N N P S N P C G S V F S T N H L Q K I L A V A A R Q [240]                                                                                 |
| <i>Hipposideros armiger</i>      | TTG GAA GCT CTG ATT GAT GAA AAG ACA GCT TGT CTC ATT GTC AAC AAT CCA TCA AAC CCC TGT GGG TCA GTG TTC AGT AAA AGT CAT CTC CAG AAG ATT TTG GCC GTG GCT GCA AGG CAG [720] |
|                                  | L E A L I D E K T A C L I V N N P S N P C G S V F S K S H L Q K I L A V A A R Q [240]                                                                                 |
| <i>Hipposideros pratti</i>       | TTG GAA GCT CTG ATT GAT GAA AAG ACA GCT TGT CTC ATT GTC AAC AAT CCA TCA AAC CCC TGT GGG TCA GTG TTC AGT AAA AGT CAT CTC CAG AAG ATT TTG GCC GTG GCT GCA AGG CAG [720] |
|                                  | L E A L I D E K T A C L I V N N P S N P C G S V F S K S H L Q K I L A V A A R Q [240]                                                                                 |
| <i>Megaderma lyra</i>            | TTG GAA TCT CTA ATT GAT GAA AAG ACA GCT TGT CTC ATT GTC AAC AAC CCA TCA AAC CCC TGT GGG TCA GTA TTC AGT AAA AGT CAT CTC CAG AAG ATT TTG GCA GTG GCT GCA AGG CAG [720] |
|                                  | L E S L I D E K T A C L I V N N P S N P C G S V F S K S H L Q K I L A V A A R Q [240]                                                                                 |
| <i>Megaderma spasma</i>          | TTG GAA TCT CTA ATT GAT GAA AAG ACA GCT TGT CTC ATT GTT AAC AAC CCA TCA AAC CCC TGT GGG TCA GTA TTC AGT AAA AGT CAT CTC CAG AAG ATT TTG GCA GTG GCT GCA AGG CAG [720] |
|                                  | L E S L I D E K T A C L I V N N P S N P C G S V F S K S H L Q K I L A V A A R Q [240]                                                                                 |
| <i>Myotis ricketti</i>           | TTG GAA TCT CTG ATT GAT GAA AAG ACA GCT TGT CTC ATT GTC AAC AAT CCA TCA AAC CCC TGT GGG TCA GTG TTC AGC AGA AGT CAT CTT CAG AAG ATT CTA GCC GTG GCT GCA AGG CAG [720] |
|                                  | L E S L I D E K T A C L I V N N P S N P C G S V F S R S H L Q K I L A V A A R Q [240]                                                                                 |
| <i>Pipistrellus abramus</i>      | TTG GAA TCT CTG ATT GAC GAA AAG ACA GCT TGT CTC ATT GTC AAT AAT CCA TCA AAC CCC TGT GGG TCG GTG TTC AGC AGA AGT CAT CTC CAG AAG ATT CTG GCG GTG GCT GCA AGG CAG [720] |
|                                  | L E S L I D E K T A C L I V N N P S N P C G S V F S R S H L Q K I L A V A A R Q [240]                                                                                 |
| <i>Scotophilus kuhlii</i>        | TTG GAA TCT CTG ATT GAT GAA AAG ACA GCT TGT CTC ATT GTC AAT AAT CCA TCA AAC CCC TGT GGG TCA GTG TTC AGC AGA AGT CAT CTT CAG AAG ATT CTG GCC GTG GCT GCA AGG CAG [720] |
|                                  | L E S L I D E K T A C L I V N N P S N P C G S V F S R S H L Q K I L A V A A R Q [240]                                                                                 |
| <i>Miniopterus fuliginosus</i>   | CTG GAA TCT CTG ATT GAT GAA AAG ACA GCT TGT CTC ATT GTC AAT AAT CCA TCA AAC CCC TGT GGG TCA GTG TTC AGT AGG AGT CAT CTC CAG AAG ATT CTG GCT GTG GCT GCA AGG CAG [720] |
|                                  | L E S L I D E K T A C L I V N N P S N P C G S V F S R S H L Q K I L A V A A R Q [240]                                                                                 |
| <i>Tadarida plicata</i>          | CTG GAA TCT TTG ATT GAT GAA AAG ACA GCT TGT CTC ATT GTC AAT AAT CCA TCA AAC CCC TGT GGG TCA GTG TTC AGT AGA AGT CAT CTC CAG AAG ATT CTG GCT GTG GCT GCA AGG CAA [720] |
|                                  | L E S L I D E K T A C L I V N N P S N P C G S V F S R S H L Q K I L A V A A R Q [240]                                                                                 |
| <i>Mormoops megalophylla</i>     | TTG GAA TCT CTG ATT GAT GAA AAG ACA GCT TGT CTC ATC ATC AAT AAC CCG TCA AAC CCC TGT GGG TCA GTG TTC AGG AGA AGT CAT CTC CAG AAG ATT CTG GCC GTG GCT GCA AGG CAG [720] |
|                                  | L E S L I D E K T A C L I I N N P S N P C G S V F R R S H L Q K I L A V A A R Q [240]                                                                                 |
| <i>Pteronotus parnellii</i>      | TTG GAA TCT CTG ATT GAT GAA AAG ACA GCT TGT CTC ATT GTC AAT AAT CCA TCA AAC CCC TGT GGG TCA GTG TTC AGC AGA AGT CAT CTC CAG GAG ATT CTG GCC GTG GCT GCA AAG CAG [720] |
|                                  | L E S L I D E K T A C L I V N N P S N P C G S V F S R S H L Q E I L A V A A R Q [240]                                                                                 |
| <i>Desmodus rotundus</i>         | CTG GAA TCT CTG ATT GAT GAA AAG ACA GCT TGT CTC GTT GTC AAT AAT CCA TCA AAC CCC TGT GGG TCA GTG TTC AGC AGA AGT CAT CTC CAG AAG ATT CTG GCC GTG GCT GCG AGG CAG [720] |
|                                  | L E S L I D E K T A C L V V N N P S N P C G S V F S R S H L Q K I L A V A A R Q [240]                                                                                 |
| <i>Leptonycteris yerbabuena</i>  | TTA GAA TCT CTG ATT GAT GAA AAG ACA GCC TGT CTC ATT GTC AAT AAT CCA TCG AAC CCC TGT GGG TCA GTG TTC AGT AGA AGT CAT CTC CAG AAG ATT CTG GCC GTG GCT GCA CGG CAG [720] |
|                                  | L E S L I D E K T A C L I V N N P S N P C G S V F S R S H L Q K I L A V A A R Q [240]                                                                                 |
| <i>Artibeus lituratus</i>        | TTG GAA TCT CTG ATT GAT GAA AAG ACA GCC TGT CTC ATT GTC AAT AAT CCA TCG AAC CCC TGT GGG TCA GTG TTC AGT AGA AGT CAT CTC CAG AAG ATT CTG ACT GTG GCT GCA AGG CAG [720] |
|                                  | L E S L I D E K T A C L I V N N P S N P C G S V F S R S H L Q K I L T V A A R Q [240]                                                                                 |







|                           |                                                                                                                                                                        |
|---------------------------|------------------------------------------------------------------------------------------------------------------------------------------------------------------------|
| human                     | ACC ATT GTC CAG GGA GCT CTG AAA AGC ATC CTA TGT CGC ACC CCG GGA GAG TTT TAC CAC AAC ACT CTG AGC TTC CTC AAG TCC AAT GCT GAT CTC TGT TAT GGG GCG TTG GCT GCC ATC [1080] |
|                           | T I V Q G A L K S I L C R T P G E F Y H N T L S F L K S N A D L C Y G A L A A I [ 360]                                                                                 |
| mouse                     | ACC ATC GTC CAA GGT GCC CTG AAG AGC ATC CTT CAG CGC ACC CCT CAG GAG TTC TAC CAG GAC ACT TTA AGC TTC CTT AAG TCC AAT GCG GAC CTC TGC TAT GGG GCG TTG TCT GCC ATT [1080] |
|                           | T I V Q G A L K S I L Q R T P Q E F Y Q D T L S F L K S N A D L C Y G A L S A I [ 360]                                                                                 |
| rat                       | ACC ATA GTC CAG GGT GCT CTG AAG AGC ATC CTT CAG CGA ACC CCT CAG GAG TTC TAT CAC GAC ACG TTA AGC TTC CTC AAG TCC AAT GCG GAC CTC TGC TAT GGG GCA CTG GCT GCC ATC [1080] |
|                           | T I V Q G A L K S I L Q R T P Q E F Y H D T L S F L K S N A D L C Y G A L A A I [ 360]                                                                                 |
| cow                       | ACC CTT GTC CAG GGA GCT CTG AAA AGC ATC CTG TGT CGC ACC CCT CGT GTG TTC TAC CAC AAC ACT CTA AGC TTC CTC AAG TCC AAT GCG GAT CTC TGC TAT GGG GCA TTG GCT GCC ATC [1080] |
|                           | T L V Q G A L K S I L C R T P R V F Y H N T L S F L K S N A D L C Y G A L A A I [ 360]                                                                                 |
| dog                       | ACC ATC GTC CAG GGA GCT CTG AAA AGC ATC CTG CGT CGC ACC CCT CAG GAG TTC TAC CAA AAT ACT CTG AGC TTC CTG AAG TCC AAT GCT GAT CTT TGC TAT GGA GCT TTG GCT GCC ATT [1080] |
|                           | T I V Q G A L K S I L R R T P Q E F Y Q N T L S F L K S N A D L C Y G A L A A I [ 360]                                                                                 |
| pig                       | ACC CTG GTC CAG GGA GCT CTG AAA AGC ATC CTG CGC CGC ACC CCT CAA GAG TTC TAC CAT AAC ACT CTA AGC TTC CTC AAG ACC AAC GCT GAC CTC TGC TAT GGG GCC TTG GCT GCT GTC [1080] |
|                           | T L V Q G A L K S I L R R T P Q E F Y H N T L S F L K T N A D L C Y G A L A A V [ 360]                                                                                 |
| panda                     | ACC ATC GTC CAG GGA GCT CTG AAA AGC ATC CTG CAT CGC ACC CCT CAG GAG TTC TAC CAC AAC ACT CTG AGC TTC CTG AAG TCC AAT GCT GAT CTT TGC TAT GGG GCA TTG GCT GCC ATC [1080] |
|                           | T I V Q G A L K S I L H R T P Q E F Y H N T L S F L K S N A D L C Y G A L A A I [ 360]                                                                                 |
| horse                     | ACC ATT GTC CAG GGA GCT CTG AAA AAT ATC CTG CGT CGC ACC CCT CAA GAG TTC TAC CAC AAC ACT CTA AGC TTA CTC AAG TCC AAT GCG GAT CTC TGC TAT GGT GCA CTG GCT GCC ATC [1080] |
|                           | T I V Q G A L K N I L R R T P Q E F Y H N T L S L L K S N A D L C Y G A L A A I [ 360]                                                                                 |
| Cynopterus sphinx         | ACC CTT GTC CAG GGA GCT CTG AAA AGC ATT CTG CGT CGC ACC CCT CAA GAG TTC TAC CAC AAC ACT TTA AGC TTC CTC AAG TCC AGT GCT GAC CTG TGC TAT GTG GCA TTG TCT GCC ATC [1080] |
|                           | T L V Q G A L K S I L R R T P Q E F Y H N T L S F L K S S A D L C Y V A L S A I [ 360]                                                                                 |
| Rousettus leschenaultii   | ACC ATT GTC CAG GGA GCT CTG AAA AGC ATT CTG CGT CGC ACC CCT CAA GAG TTC TAC CAC AAC ACT TTA AGC TTC CTC AAG TCC AAT GCT GAT CTG TGC TAT GAG GCA TTG GCT GCC ATC [1080] |
|                           | T I V Q G A L K S I L R R T P Q E F Y H N T L S F L K S N A D L C Y E A L A A I [ 360]                                                                                 |
| Eonycteris spelaea        | ACC ATC GTC CAG GGA GCT CTG AAA AGC ATT CTG CGT CGT ACC CCT CAA GAG TTC TAC CAC AAC ACT TTA AGC TTC CTC AAG TCC AGT GCT GAT CTG TGC TAT GAG GCA TTG GCT GCC ATC [1080] |
|                           | T I V Q G A L K S I L R R T P Q E F Y H N T L S F L K S S A D L C Y E A L A A I [ 360]                                                                                 |
| Pteropus vampyrus         | ACC GTT GTC CAG GGA GCT CTG AAG AGC ATT CTG CGT CGC ACC CCT CAA GAG TTC TAC CGC AAC ACT TTA AGC GTC CTC AAG TCC AGT GCT GAT CTG TGC TAT GAG GCA TTG TCT GCC ATC [1080] |
|                           | T V V Q G A L K S I L R R T P Q E F Y R N T L S V L K S S A D L C Y E A L S A I [ 360]                                                                                 |
| Rhinolophus ferrumequinum | ACC ATT GTC CAG GGA GCT CTG AAA AGC ATC CTG CAT CGC ACC CCT CAA GAG TTC TAC CAC AAC ACT CTA AGC TTC CTC AAG TCC AAT GCG GAT CTG TGC TAT GGG GCA TTG GCT GCC ATC [1080] |
|                           | T I V Q G A L K S I L H R T P Q E F Y H N T L S F L K S N A D L C Y G A L A A I [ 360]                                                                                 |
| Rhinolophus pusillus      | ACC ATT GTC CAG GGA GCT CTG AAA AGC ATC CTG CAT CGC ACC CCT CAA GAG TTC TAC CAC AAC ACT CTA AGC TTC CTC AAG TCC AAT GCG GAT CTG TGC TAT GGG GCA TTG GCT GCC ATC [1080] |
|                           | T I V Q G A L K S I L H R T P Q E F Y H N T L S F L K S N A D L C Y G A L A A I [ 360]                                                                                 |
| Hipposideros armiger      | ACC CTT GTC CAG GGA GCT CTG AAA AAC ATC CTG CGT CGC ACC CCT CAA GAA TTC TAC CAC AAC ACT CTA AGC TTC CTC AAG TCC AAT GCT GAT CTG TGC TAT GGG GCG TTG TCT GCC ATC [1080] |
|                           | T L V Q G A L K N I L R R T P Q E F Y H N T L S F L K S N A D L C Y G A L S A I [ 360]                                                                                 |
| Hipposideros pratti       | ACC CTT GTC CAG GGA GCT CTG AAA AAC ATC CTG CGT CGC ACC CCT CAA GAA TTC TAC CAC AAC ACT CTA AGC TTC CTC AAG TCC AAT GCT GAT CTG TGC TAT GGG GCA TTG TCT GCC ATC [1080] |
|                           | T L V Q G A L K N I L R R T P Q E F Y H N T L S F L K S N A D L C Y G A L S A I [ 360]                                                                                 |
| Megaderma lyra            | ACC ATT GTC CAG GGA GCT CTG AAA AGC ATC CTG CGT CGC ACC CCT CAA GAG TTC TAC CAC AAC ACT CTA AGC TTC CTC AAG TCT AAT GCT GAT CTG TGC TAT GGG GCA CTG GCT GCC ATC [1080] |
|                           | T I V Q G A L K S I L R R T P Q E F Y H N T L S F L K S N A D L C Y G A L A A I [ 360]                                                                                 |
| Megaderma spasma          | ACC ATT GTC CAG GGA GCT CTG AAA AGC ATC CTG CGT CGC ACC CCT CAA GAG TTC TAC CAC AAC ACT CTA AGC TTC CTC AAG TCC AAT GCC GAT CTG TGC TAT GGG GCA CTG GCT GCC ATC [1080] |
|                           | T I V Q G A L K S I L R R T P Q E F Y H N T L S F L K S N A D L C Y G A L A A I [ 360]                                                                                 |
| Myotis ricketti           | ACC ATT GTC CAG GGA GCT TTG AAA AGC ATC CTG CGT CGC ACC CCT CAA GAG TTC TAC CAC GAC ACC CTA AGC TTC CTC AAG TCC AAT GCT GAC CTG TGC TAT GGG GCG TTG GCT GCC ATC [1080] |
|                           | T I V Q G A L K S I L R R T P Q E F Y H D T L S F L K S N A D L C Y G A L A A I [ 360]                                                                                 |
| Pipistrellus abramus      | ACC ATT GTC CAG GGA GCT TTG AAA AGC ATC CTG CGT CGC ACC CCT CAA GAG TTC TAC CAC GAC ACC CTA AGC TTC CTC AGG TCC AAT GCT GAT CTG TGC TAT GGG GCG TTG GCT GCC ATT [1080] |
|                           | T I V Q G A L K S I L R R T P Q E F Y H D T L S F L R S N A D L C Y G A L A A I [ 360]                                                                                 |
| Scotophilus kuhlii        | ACC ATT GTC CAG GGA GCT TTG AAA AGC ATC CTG CGT CGC ACC CCT CAA GAG TTC TAC CAC GAC ACC CTA AGC TTC CTC AAG TCC AAT GCT GAT CTG TGC TAT GGG GCG TTG GCT GCA ATC [1080] |
|                           | T I V Q G A L K S I L R R T P Q E F Y H D T L S F L K S N A D L C Y G A L A A I [ 360]                                                                                 |
| Miniopterus fuliginosus   | ACT ATT GTC CAG GGA GCT TTG AAA AGC ATC CTG CAT CGC ACC ACT CAA GAG TTC TTC CAG GAT ACT CTA AGC TTC CTC AAG TCC AAT GCT GAC CTG TGC TAT GGG GCG TTG GCT GCC ATC [1080] |
|                           | T I V Q G A L K S I L H R T T Q E F F Q D T L S F L K S N A D L C Y G A L A A I [ 360]                                                                                 |
| Tadarida plicata          | ACC ATT GTC CAG GGA GCT TTG AAA AGC ATC CTG CGT CGC ACC CCT CAA GAG TTC TAC CAC AAC ACT CTA AGC TTC CTC AAG TCC AAT GCT GAT CTG TGC TAT GGG GCA TTG GCT GCC ATC [1080] |
|                           | T I V Q G A L K S I L R R T P Q E F Y H N T L S F L K S N A D L C Y G A L A A I [ 360]                                                                                 |
| Mormoops megalophylla     | ACC ATT GTC CAG GGG GCT TTG AAA AGC ATC CTG CGT CGT ACC CCT CGG GAG TTC TAC CAC AAC ACT CTA AGC TTC CTC AAG TCC AGT GCT GAT CTG TGC TAT GGA GCA CTG GCT GCC ATC [1080] |
|                           | T I V Q G A L K S I L R R T P R E F Y H N T L S F L K S S A D L C Y G A L A A I [ 360]                                                                                 |
| Pteronotus parnellii      | ACC ATT GTC CAG GGA GCT TTG AAA AGC ATC CTG CGC CGC ACC CCC CAA GAG TTC TAC CAC AAC ACG CTA AGC TTC CTC AAG TCC AAT GCT GAT CTG TGC TAT GGG GCG TTG GCT GCT GTC [1080] |
|                           | T I V Q G A L K S I L R R T P Q E F Y H N T L S F L K S N A D L C Y G A L A A V [ 360]                                                                                 |
| Desmodus rotundus         | ACC ATT GTT CAG GGA GCT TTG AAA AGC ATC CTG CGT CGC ACC CCT CAA GAA TTT TAC CAA AAC ACA CTA AGC TTC CTC AAG TCC AAT GGG GAT CTG TGC TAT GGG GCA TTG GCT GCC ATC [1080] |
|                           | T I V Q G A L K S I L R R T P Q E F Y Q N T L S F L K S N G D L C Y G A L A A I [ 360]                                                                                 |
| Leptonycteris yerbabuena  | ACC ATT GTC CAG GGT GCT TTG AAA AGC ATC CTG CGT CGC ACC CCT CAA GAG TTC TAC CAC AAC ACT CTA AGC TTC CTC AAG TCC AAT GCT GAT CTG TGC TAT GGG GCT TTG GCT GCC ATC [1080] |
|                           | T I V Q G A L K S I L R R T P Q E F Y H N T L S F L K S N A D L C Y G A L A A I [ 360]                                                                                 |
| Artibeus lituratus        | ACC ATT GTC CAG GGA GCT TTG AAA AGC ATC CTG CGT CGC ACC CCT CAA GAG TTC TAC CAC AAC ACT CTA AGC TTC CTC AAG TCC AAT GCT GAC TTG TGC TAT GGG GCT TTG GCT GCC ATT [1080] |
|                           | T I V Q G A L K S I L R R T P Q E F Y H N T L S F L K S N A D L C Y G A L A A I [ 360]                                                                                 |
