# Supplementary material for: Relaxed Evolution in the Tyrosine Aminotransferase Gene Tat in Old World Fruit Bats (Chiroptera: Pteropodidae)
Source: PubMed Central journal article supplement (PMC4019583; doi:10.1371/journal.pone.0097483), 2014-05-13

(A)

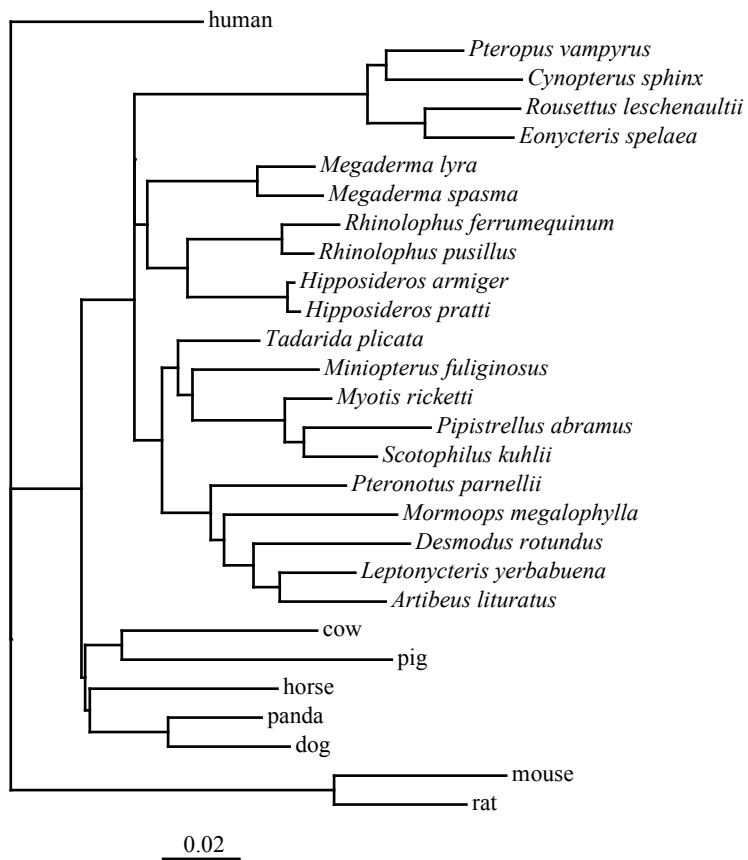

(B)

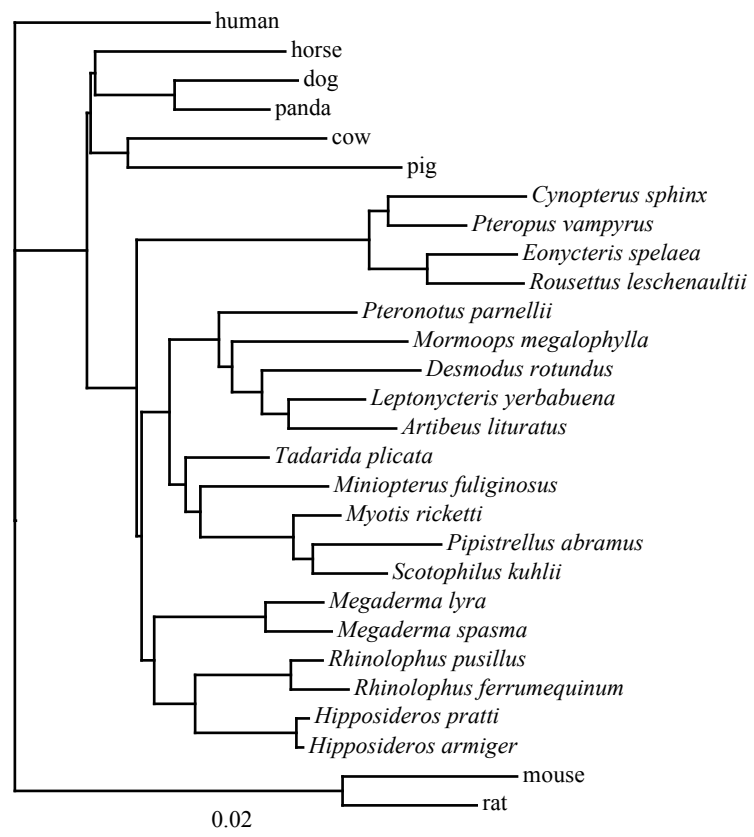

(C)

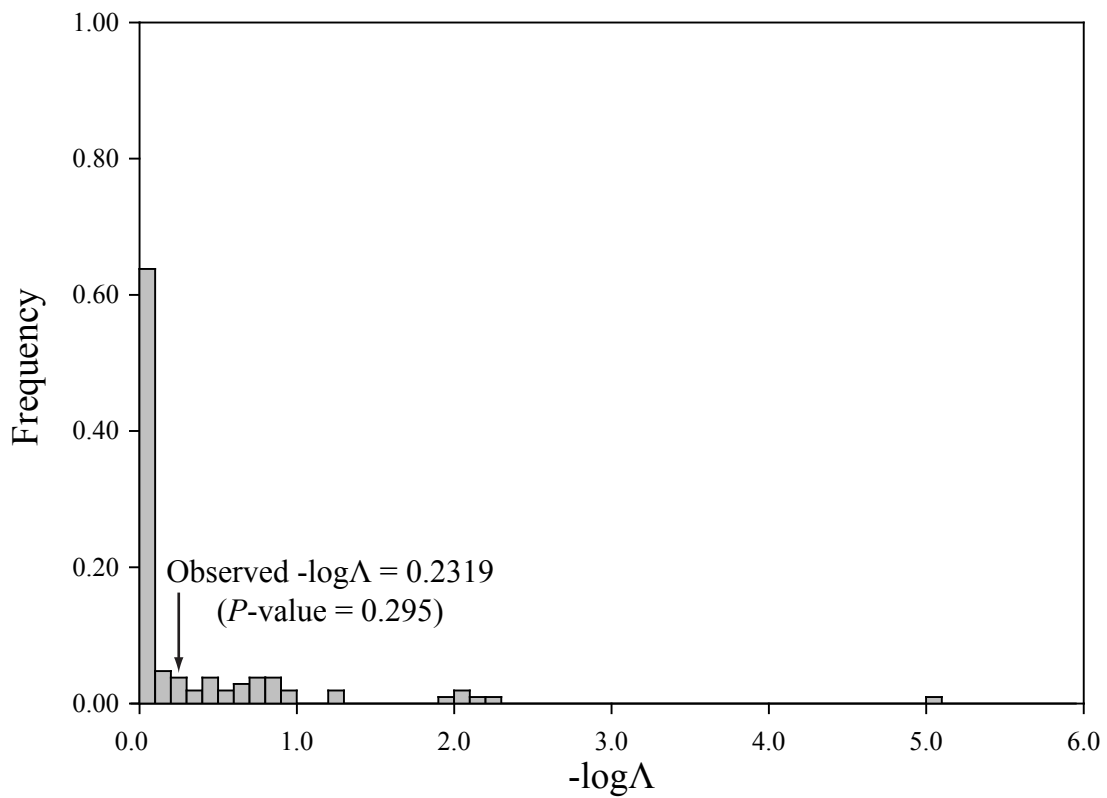

Supplement: pone.0097483.s006.pdf [file pone.0097483.s006.pdf]
